# Supplementary material for: Maf1 regulates intracellular lipid homeostasis in response to DNA damage response activation
Source: PubMed Central journal article supplement — Mol Biol Cell. 2021 May 15;32(11):1086–93. doi: 10.1091/mbc.E20-06-0378 (PMC8351542; doi:10.1091/mbc.e20-06-0378), 2021-05-15
Supplement: mbc-32-1086-s001.pdf [file mbc-32-1086-s001.pdf]

# Supplemental Materials

*Molecular Biology of the Cell*

Hammerquist *et al.*

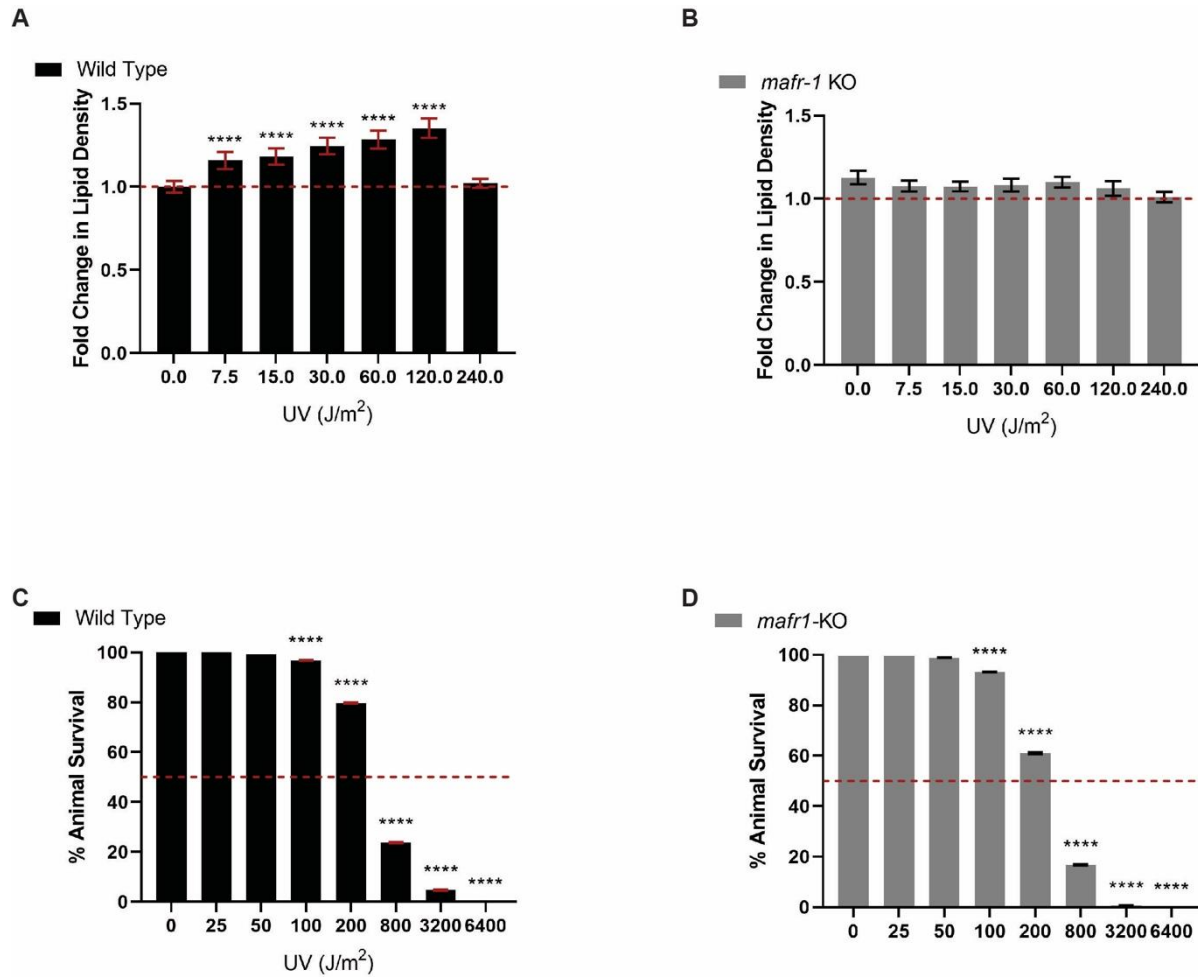

**Supplemental Fig. 1. Lack of MAFR-1 results in failure to elevate lipid density and decreased survival in response to UV phototoxicity. (A-B).** Quantification of lipid density in whole WT (A) and *maf-1* KO (B) worms in response to increasing doses of UV light (C-D). Survival of WT (C) and *maf-1* KO (D) animals following UV exposure. The red dashed line shows the mean lipid density in untreated wild type animals. A one-way ANOVA test with Tukey's *post hoc* test was used for multiple sample comparisons in lipid density data. See **Descriptive Statistics Table** for sample sizes used in each experiment. \*,  $p < 0.05$ ; \*\*,  $p < 0.01$ ; \*\*\*\*,  $p < 0.0001$ ; n.s., no significance. Error bars show 95% C.I. of the mean.

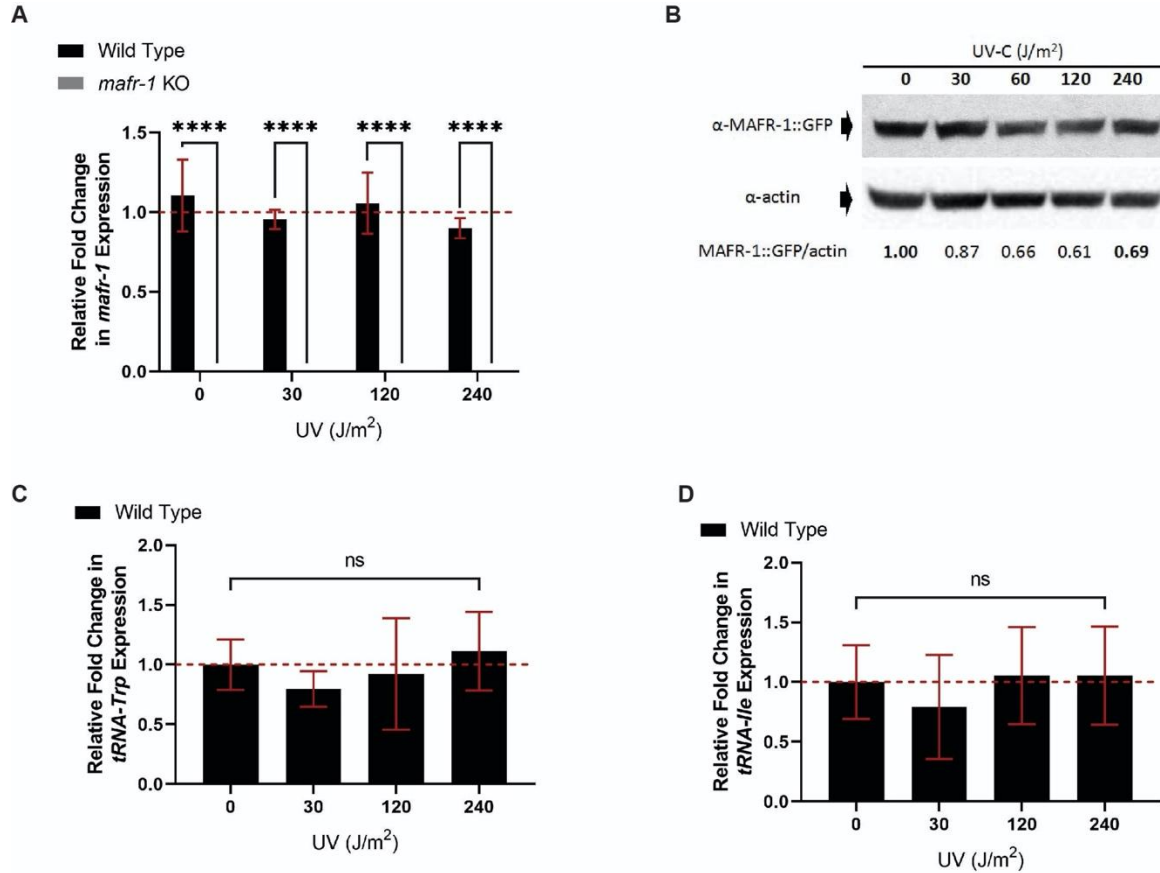

**Supplemental Fig. 2. Increasing UV light results in reduced *mafr-1* and MAFR-1 expression without changing RNA pol III transcript expression.** (A) *mafr-1* KO animals showed no detectable *mafr-1* expression. (B) MAFR-1 stability decreases with increasing UV light exposure in a MAFR-1::GFP multicopy overexpressing strain. (C-D) Relative to untreated animals, wild type worms show no change in *tRNA-Trp* (C) and *tRNA-Ile* (D) expression in response to increasing doses of UV light. A one-way ANOVA test with Tukey's *post hoc* test was used for multiple sample comparisons in qPCR data. See **Descriptive Statistics Table** for sample sizes used in each experiment. \*,  $p < 0.05$ ; \*\*,  $p < 0.01$ ; \*\*\*,  $p < 0.001$ ; \*\*\*\*,  $p < 0.0001$ ; n.s., no significance. Error bars show 95% C.I. of the mean.

A

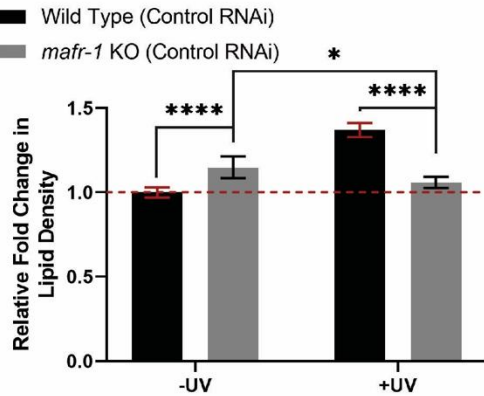

B

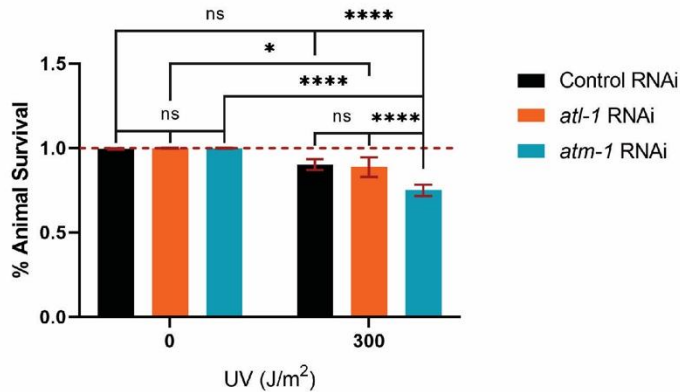

C

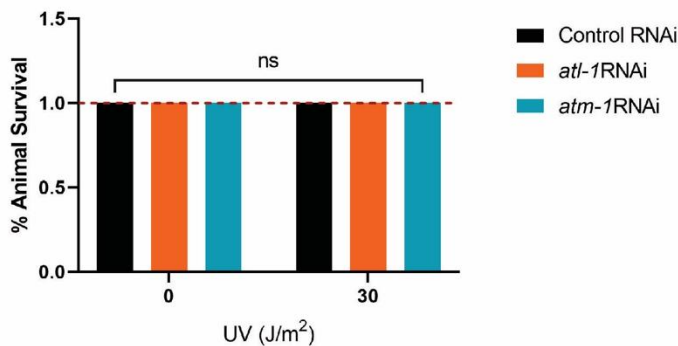

**Supplemental Fig. 3. Following UV light phototoxicity, *mafr-1* KO animals fed an HT115/K-12 *E. coli* diet recapitulate the failure to elevate lipid density of worms fed an OP50/B *E. coli* diet. (A)** WT and *mafr-1* KO animals fed an HT115/K-12 *E. coli* diet exhibit similar lipid accumulation as worms fed an OP50/B *E. coli* diet. **(B-C)** Survival of UV-exposed animals on *atl-1* and *atm-1* RNAi. RNAi of *atm-1*, but not *atl-1* decrease survival of WT animals at 300 J/m<sup>2</sup> UV. **(B)** Neither *atl-1* or *atm-1* RNAi affects animal survival at 30 J/m<sup>2</sup> **(C)**. A one-way ANOVA test with Tukey's *post hoc* test was used for multiple sample comparisons in lipid density data. See **Descriptive Statistics Table** for sample sizes used in each experiment. \*, p<0.05; \*\*\*\*, p<0.0001. Error bars show 95% C.I. of the mean.

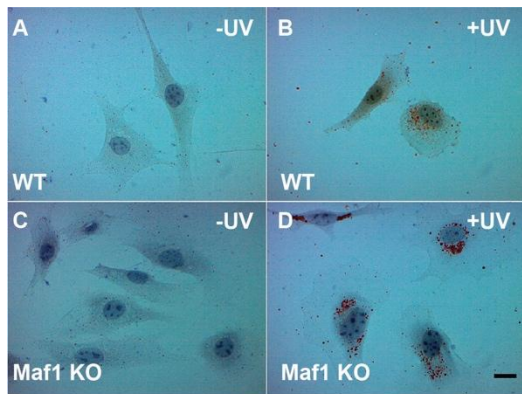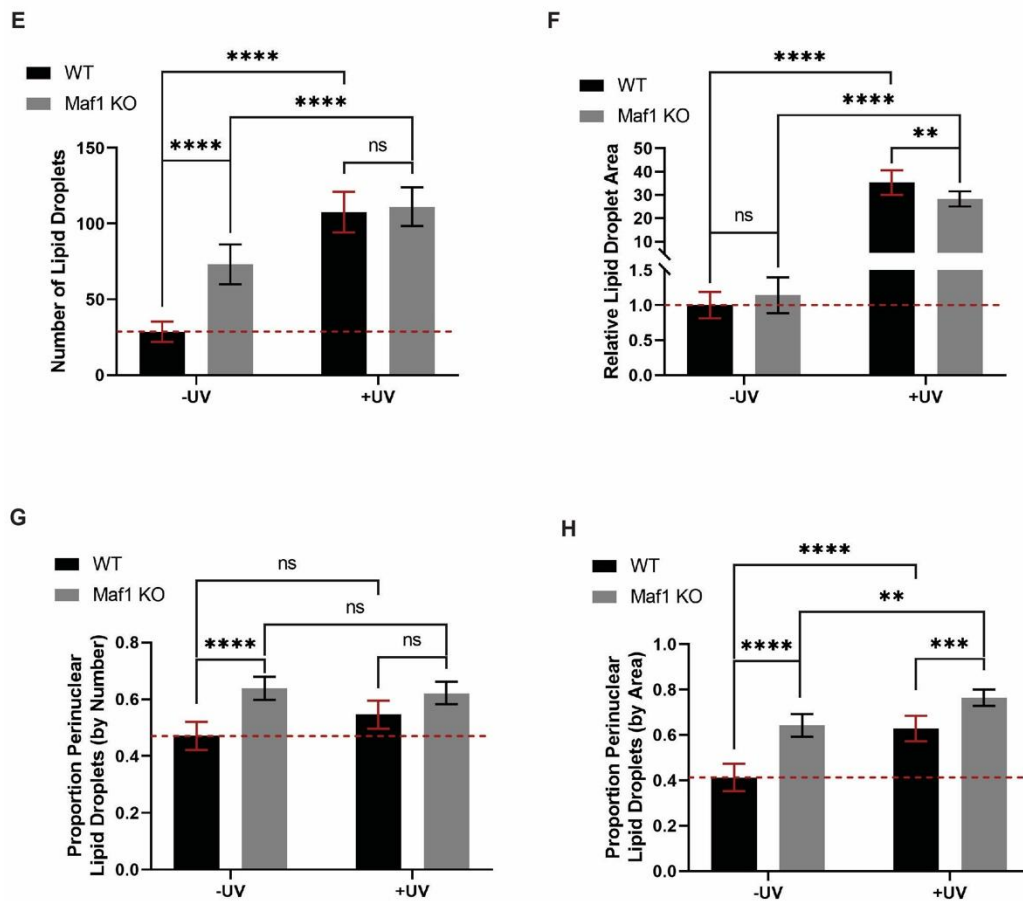

**Supplemental Fig. 4. Lack of Maf1 in mouse embryonic fibroblast (MEF) cells results in altered lipid accumulation in response to UV phototoxicity.** (A-D) Images of MEF cells stained with Oil Red O following exposure 0 or 30 J/m<sup>2</sup> of UV light. (E-F) Quantification of Oil Red O staining: both (E) number of lipid droplets and (F) total area of lipid droplets increase upon exposure to UV. (G-H) Proportion of the number (G) and total area (H) of lipid droplets localized to perinuclear region (defined as within 8.4 microns of the nucleus) increases upon UV exposure. Proportion of area (H) is also more perinuclear in Maf1 KO background. One-way ANOVA test with Tukey's post hoc test was used for multiple sample comparisons in lipid density data. See **Descriptive Statistics Table** for sample sizes used in each experiment. \*, p<0.05; \*\*, p<0.01; \*\*\*\*, p<0.0001; n.s., no significance. Error bars show 95% C.I. of the mean. Scale bar is 100  $\mu$ m.
